# Supplementary material
Source: PubMed Central journal article supplement (PMC2917001)
Supplement: NIHMS177830-supplement-01.pdf [file NIHMS177830-supplement-01.pdf]

Table S1:

| Gene/Transcript ID | Primer name          | Sequence                               |
|--------------------|----------------------|----------------------------------------|
| AAEL003389         | Attacin Forward      | 5'-<br>TTGGCAGGCACGGAATGTCTTG-3'       |
|                    | Attacin Reverse      | 5'-TGTTGTCGGGACCGGGAAGTG-<br>3'        |
| AAEL009496         | Ribosomal S7 Forward | 5'-<br>GGGACAAATCGGCCAGGCTATC-<br>3'   |
|                    | Ribosomal S7 Reverse | 5'-TCGTGGACGCTTCTGCTTGTTG-<br>3'       |
| AAEL015515         | Cecropin-A Reverse   | 5'-<br>TCACAAAGTTATTTCTCCTGATCG-<br>3' |
|                    | Cecropin-A Forward   | 5'-GCTTTAGCCCCAGCTACAAC-3'             |
| AAEL003832         | Defensin-C Forward   | 5'-TTGTTTGCTTCGTTGCTCTTT-3'            |
|                    | Defensin-C Reverse   | 5'-ATCTCCTACACCGAACCCACT-3'            |
| AAEL003841         | Defensin-A Forward   | 5'-CTGCCGGAGGAAACCTATCAG-<br>3'        |
|                    | Defensin-A Reverse   | 5'-<br>GCAATGCAATGAGCAGCACAAG-<br>3'   |
| AAEL004522         | Gambicin Forward     | 5'-GCCAAAACCTGTTCTCTTG-3'              |
|                    | Gambicin Reverse     | 5'-CGATGTAGCATTCCGGTGATG-3'            |
| AAEL015404         | Lysozyme Forward     | 5'-CCACGGCAACTGGATATGTCT-<br>3'        |
|                    | Lysozyme Reverse     | 5'-TCTGCGTCACCTTGGTGGTAT-3'            |
| AAEL004833-RA      | Diptericin Forward   | 5'-ATCCGATTCAGAATTCGCTTT-3'            |
|                    | Diptericin Reverse   | 5'-TTTACCGTCTCCCTGAAATCC-3'            |
